# Supplementary material for: Common α-globin variants modify hematologic and other clinical phenotypes in sickle cell trait and disease
Source: PLOS journal article supplement (doi:10.1371/journal.pgen.1007293), 2018-03-28
Supplement: S9 (10.1371/journal.pgen.1007293.s009) [file journal.pgen.1007293.s009]

**S8 Table. Association of  $\alpha$ -thalassemia and rs11865131 with RBC traits in the Cooperative Study of Sickle Cell Disease (CSSCD).**

|                                                        | <b><math>\alpha</math>-thalassemia</b> |                        |                                                              | <b>rs11865131</b> |          |          | <b>rs11865131 adjusted for <math>\alpha</math>-thalassemia</b> |          |          |
|--------------------------------------------------------|----------------------------------------|------------------------|--------------------------------------------------------------|-------------------|----------|----------|----------------------------------------------------------------|----------|----------|
| <b>Trait</b>                                           | <b>Beta (SE)</b>                       | <b>P</b>               | <b>N</b><br><b>HbSS/HbSS+<math>\alpha</math>-thalassemia</b> | <b>Beta (SE)</b>  | <b>P</b> | <b>N</b> | <b>Beta (SE)</b>                                               | <b>P</b> | <b>N</b> |
| <b>RBC Count</b><br>(x 10 <sup>6</sup> cells/ $\mu$ l) | 0.424<br>(0.036)                       | 1.17x10 <sup>-29</sup> | 716/318                                                      | -0.040<br>(0.030) | 0.181    | 1034     | 0.020<br>(0.029)                                               | 0.490    | 1034     |
| <b>MCV (fL)</b>                                        | -7.543<br>(0.492)                      | 6.41x10 <sup>-48</sup> | 716/318                                                      | 1.349<br>(0.419)  | 0.001    | 1034     | 0.309<br>(0.386)                                               | 0.425    | 1034     |
| <b>MCH (pg/dL)</b>                                     | -2.693<br>(0.177)                      | 1.02x10 <sup>-46</sup> | 611/307                                                      | 0.238<br>(0.158)  | 0.133    | 918      | -0.163<br>(0.144)                                              | 0.255    | 918      |
| <b>Hematocrit (%)</b>                                  | 1.566<br>(0.241)                       | 1.29x10 <sup>-10</sup> | 789/342                                                      | -0.184<br>(0.189) | 0.330    | 1131     | 0.041<br>(0.189)                                               | 0.827    | 1131     |
| <b>Hemoglobin (g/dL)</b>                               | 0.352<br>(0.077)                       | 5.62x10 <sup>-6</sup>  | 789/342                                                      | -0.060<br>(0.060) | 0.318    | 1131     | -0.010<br>(0.060)                                              | 0.871    | 1131     |

Abbreviations: RBC=red blood cell; MCV = mean corpuscular volume; MCH = mean corpuscular hemoglobin; SE: Standard Error; OR = odds ratio; CI = confidence interval.

For the  $\alpha$ -thalassemia model, beta coefficients correspond to estimates of mean difference between HbSS patients without  $\alpha$ -thalassemia compared to HbSS patients with  $\alpha$ -thalassemia. For rs11865131, beta coefficients correspond to estimates of mean difference associated with carrying each additional copy of the rs11865131 A-allele compared to the reference group of individuals carrying the rs11865131 G/G genotype. All models were adjusted for age, sex, and the first 10 principal components of genetic
